# Supplementary material for: Promote Community Engagement in Participatory Research for Improving Breast Cancer Prevention: The P.I.N.K. Study Framework
Source: MDPI journal article supplement (doi:10.3390/cancers14235801), 2022-11-25
Supplement: s1 [file s1]

## Appendix B

**Table S1** - Distribution of the characteristics included in the profile 1: Fuchsia family and focus on each combination of communities within the Fuchsia family

| Profile 1 - non modifiable factors:<br>Profile 2 - personal history<br>Profile 3 - lifestyle habits | Combinations of communities within the Fuchsia family |                     |                     |                     |                    | chi-square test | Fuchsia combinations other than FYF | chi-square test | Overall Fuchsia family |
|-----------------------------------------------------------------------------------------------------|-------------------------------------------------------|---------------------|---------------------|---------------------|--------------------|-----------------|-------------------------------------|-----------------|------------------------|
|                                                                                                     | Fuchsia                                               | Fuchsia             | Fuchsia             | Fuchsia             | Fuchsia            |                 |                                     |                 |                        |
| Combination                                                                                         | FYF                                                   | FYY                 | FYG                 | FYB                 | FYA                |                 |                                     |                 |                        |
| Number of women                                                                                     | 193                                                   | 360                 | 136                 | 342                 | 268                |                 | 1,106                               |                 | 1,299                  |
| BC prevalence<br>[95% CI]                                                                           | 4.7%<br>[2.1-8.7%]                                    | 1.9%<br>[0.8 -4.0%] | 2.2%<br>[0.5 -6.3%] | 2.3%<br>[1.0 -4.6%] | 1.9%<br>[0.6-4.3%] | p>0.05          | 2.1%<br>[1.4 -3.1%]                 | p=0.033         | 2.5%<br>[1.7-3.5%]     |
| Years of age (average±SD)<br><i>focus on age classes</i>                                            | 68.5 (±6.5)                                           | 64.8 (±7.3)         | 62.8 (±3.6)         | 63.2 (±7.0)         | 64.0 (±6.9)        |                 | 63.8 (±6.8)                         |                 | 64.5 (±6.9)            |
| <b>Breast density</b>                                                                               |                                                       |                     |                     |                     |                    | p>0.05          |                                     | p>0.05          |                        |
| BI-RADS A (less dense)                                                                              | 29.5%                                                 | 29.7%               | 24.3%               | 26.3%               | 31.7%              |                 | 28.5%                               |                 | 28.6%                  |
| BI-RADS B                                                                                           | 44.6%                                                 | 45.3%               | 44.9%               | 46.5%               | 46.6%              |                 | 45.9%                               |                 | 45.7%                  |
| BI-RADS C                                                                                           | 23.8%                                                 | 23.3%               | 27.2%               | 25.7%               | 20.9%              |                 | 24.0%                               |                 | 23.9%                  |
| BI-RADS D                                                                                           | 2.1%                                                  | 1.7%                | 3.7%                | 1.5%                | 0.7%               |                 | 1.6%                                |                 | 1.7%                   |
| <b>Family history</b>                                                                               |                                                       |                     |                     |                     |                    | p>0.05          |                                     | p>0.05          |                        |
| <i>no first line relatives' BC</i>                                                                  | 80.8%                                                 | 79.2%               | 76.5%               | 79.5%b              | 76.1%              |                 | 78.2%                               |                 | 78.6%                  |
| <i>first line female relative's BC</i>                                                              | 19.2%                                                 | 20.8%               | 23.5%               | 20.5%b              | 23.9%              |                 | 21.8%                               |                 | 21.4%                  |
| <i>first line male relative's BC</i>                                                                | 0.0%                                                  | 0.0%                | 0.0%                | 0.0%a               | 0.0%               |                 | 0.0%                                |                 | 0.0%                   |
| <i>first line male and female relatives' BC</i>                                                     | 0.0%                                                  | 0.0%                | 0.0%                | 0.0%b               | 0.0%               |                 | 0.0%                                |                 | 0.0%                   |
| Age of menarche (Avg. years±SD)                                                                     | 12.5 (±1.3)                                           | 12.4 (±1.4)         | 12.3 (±1.3)         | 12.3 (±1.4)         | 12.3 (±1.4)        |                 | 12.4 (±1.4)                         |                 | 12.4 (±1.4)            |
| Reproductive period length                                                                          | 38.5 (±3.8)                                           | 39.1 (±3.6)         | 38.8 (±4.1)         | 38.7 (±4.0)         | 38.9 (±4.3)        | p>0.05          | 38.9 (±3.9)                         | p>0.05          | 38.8 (±3.9)            |
| Menopause status length (Avg. years±SD)<br><i>focus on lenth classes</i>                            | 17.5 (±7.8)<br>≤5(-);>5(+)                            | 13.3 (±7.8)         | 11.7 (±5.0)         | 12.1 (±7.3)         | 12.7 (±7.8)        | p>0.05          | 12.6 (±7.4)<br>≤5(+);>5(-)          | p=0.000         | 13.3 (±7.7)            |

Association between each risk factor and each Fuchsia combination (chi-square test p< 0.05): \*negative (adj. residual <-2); \*\*positive (adj. residual >2);

Association between BC cases and each risk factor by Fuchsia combinations (chi-square test  $p < 0.05$ ): (a) negative (adj. res.  $< -2$ ); (b) positive (adj. res.  $> 2$ )

Association between each risk factor in the comparison of the FYF and the group of the other Fuchsia combinations (chi-square test  $p < 0.05$ ): (-) negative (adj. residual  $< -2$ ); (+) positive /adj. residual  $> 2$ ;

Association between BC cases and each risk factor in the comparison of the FYF and the group of the other Fuchsia combinations (chi-square test  $p < 0.05$ ): (c) positive (adj. residual  $> 2$ )

**Table S2 -** Distribution of the characteristics included in the profile 2: Fuchsia family and focus on each combination of communities within the Fuchsia family

| Combination                               | Combinations of communities within the Fuchsia family |             |             |             |            | chi-square test | Fuchsia combinations other than FYF | chi-square test | Overall Fuchsia family |
|-------------------------------------------|-------------------------------------------------------|-------------|-------------|-------------|------------|-----------------|-------------------------------------|-----------------|------------------------|
|                                           | FYF                                                   | FYY         | FYG         | FYB         | FYA        |                 |                                     |                 |                        |
| <b>Number of women</b>                    | 193                                                   | 360         | 136         | 342         | 268        |                 | 1,106                               |                 | 1,299                  |
| <b>BC prevalence</b>                      | 4.7%                                                  | 1.9%        | 2.2%        | 2.3%        | 1.9%       | p>0.05          | 2.1%                                | p=0.033         | 2.5%                   |
| <b>[95% CI]</b>                           | [2.1-8.7%]                                            | [0.8 -4.0%] | [0.5 -6.3%] | [1.0 -4.6%] | [0.6-4.3%] |                 | [1.4 -3.1%]                         |                 | [1.7-3.5%]             |
| <b>Qualification</b>                      |                                                       |             |             |             |            | p<0.001         |                                     | p=0.009         |                        |
| primary or secondary education            | 44.0%**(+)                                            | 33.9%(b)    | 29.4%       | 26.6%*      | 40.7%**    |                 | 32.7%*(-)                           |                 | 34.4%                  |
| high school graduation                    | 30.6%                                                 | 35.8%(a)    | 36.0%       | 35.1%       | 36.6%      |                 | 35.8%                               |                 | 35.0%                  |
| university or post graduate degree        | 25.4%                                                 | 30.3%       | 34.6%       | 38.3%**     | 22.8%*     |                 | 31.5%                               |                 | 30.6%                  |
| <b>Occupation</b>                         |                                                       |             |             |             |            | p<0.001         |                                     | p<0.001         |                        |
| unemployed/housewife                      | 74.1%**(+)                                            | 62.8%       | 55.9%       | 53.5%*      | 53.4%*     |                 | 56.8%(-)                            |                 | 59.3%                  |
| employed                                  | 20.7%*(-)                                             | 32.8%       | 41.2%       | 40.9%**     | 42.9%**    |                 | 38.8%(+)                            |                 | 36.1%                  |
| retired                                   | 5.2%                                                  | 4.4%        | 2.9%        | 5.6% (b)    | 3.7%       |                 | 4.4%                                |                 | 4.5%                   |
| employed/retired who worked night shifts  | 0.0%                                                  | 0.0%        | 0.0%        | 0.0%        | 0.0%       |                 | 0.0%                                |                 | 0.0%                   |
| <b>Current/past Co-morbid. (yes)</b>      |                                                       |             |             |             |            | p>0.05          |                                     | p>0.05          |                        |
| 1 co-morbidity                            | 20.7%                                                 | 21.9%       | 28.7%       | 28.9%       | 25.0%      |                 | 25.7%                               |                 | 24.9%                  |
| at least 2 co-morbidities groups:         | 71.0%                                                 | 70.3%       | 65.4%       | 63.7%       | 69.4%      |                 | 67.5%                               |                 | 68.0%                  |
| Cardiometabolic Diseases                  | 71.0%                                                 | 70.3%       | 69.9%       | 67.0%       | 75.0%      | p>0.05          | 70.3%                               | p>0.05          | 70.4%                  |
| Endocrine Diseases                        | 52.8%                                                 | 52.5%       | 56.6%       | 49.7%       | 51.9%      | p>0.05          | 52.0%                               | p>0.05          | 52.1%                  |
| Intestinal Diseases                       | 16.1%                                                 | 12.5%       | 8.8%        | 12.9%       | 13.8%      | p>0.05          | 12.5%                               | p>0.05          | 13.0%                  |
| Neuropsychiatric Diseases                 | 42.5%                                                 | 46.9%       | 41.2%       | 43.3%       | 45.9%      | p>0.05          | 44.8%                               | p>0.05          | 44.5%                  |
| Autoimmune disease                        | 36.3%(+)                                              | 27.5%       | 27.9%       | 29.8%       | 30.6%      | p>0.05          | 29.0%(-)                            | p=0.043         | 30.1%                  |
| <b>Chest radiation therapy (yes)</b>      | 13.5%                                                 | 15.6%       | 5.9%*       | 12.3%       | 17.2%      | p=0.023         | 13.7%                               | p>0.05          | 13.7%                  |
| <b>Pregnancy experience(at least one)</b> | 90.2%                                                 | 91.4%       | 87.5%       | 87.4%       | 86.9%      | p>0.05          | 88.6%                               | p>0.05          | 88.8%                  |
| <b>Breast feeding experience (yes)</b>    | 74.6%                                                 | 74.7%       | 73.5%       | 73.7%       | 69.4%      | p>0.05          | 73.0%                               | p>0.05          | 73.2%                  |

|                                                    |            |       |         |                   |         |                 |         |
|----------------------------------------------------|------------|-------|---------|-------------------|---------|-----------------|---------|
| <b>BMI</b>                                         |            |       |         |                   |         | p=0.011         | p>0.05  |
| underweight (<18.5)                                | 0.0%       | 0.3%  | 0.0%    | 1.2%** <b>(b)</b> | 0.0%    | 0.5% <b>(b)</b> | 0.4%    |
| normal weight (18.5 - 24.9)                        | 53.9%      | 55.8% | 61.0%   | 64.3%**           | 47.0%*  | 57.0%           | 56.5%   |
| overweight (25 - 29.9)                             | 35.2%      | 31.1% | 25.7%   | 23.7%*            | 32.8%   | 28.6%           | 29.6%   |
| obese (≥30)                                        | 10.9%      | 12.8% | 13.2%   | 10.8%             | 20.1%** | 14.0%           | 13.5%   |
| <b>Weight gain in menopause</b>                    |            |       |         |                   |         | p=0.012         | p>0.05  |
| yes                                                | 63.2%      | 70.0% | 64.7%   | 63.7%             | 75.4%** | 68.7%           | 67.9%   |
| <b>Oral contraceptive use</b>                      |            |       |         |                   |         | p=0.001         | p<0.001 |
| never or less than 1 year                          | 74.1%**(+) | 59.2% | 50.0%*  | 56.7%             | 56.7%   | 56.7%(-)        | 59.3%   |
| 1-5 years                                          | 16.1%*(-)  | 22.5% | 29.4%** | 22.8%             | 22.4%   | 23.4%(+)        | 22.3%   |
| more than 5 years                                  | 9.8%*(-)   | 18.3% | 20.6%   | 20.5%             | 20.9%   | 19.9%(+)        | 18.4%   |
| <b>Hormone therapy for ovarian stimulation use</b> |            |       |         |                   |         | p>0.05          | p>0.05  |
| at least 1 cycle of stimulation                    | 1.0%       | 2.2%  | 3.7%    | 3.8%              | 3.7%    | 3.3%            | 2.9%    |
| <b>Hormone replacement therapy use (HRT)</b>       |            |       |         |                   |         | p>0.05          | p>0.05  |
| more than 6 month                                  | 23.8%      | 22.8% | 17.6%   | 27.8%             | 23.9%   | 24.0%           | 23.9%   |

Association between each risk factor and each Fuchsia combination (chi-square test  $p < 0.05$ ): \*negative (adj. residual  $< -2$ ); \*\*positive (adj. residual  $> 2$ );

Association between BC cases and each risk factor by Fuchsia combinations (chi-square test  $p < 0.05$ ): (a) negative (adj. res.  $< -2$ ); (b) positive (adj. res.  $> 2$ )

Association between each risk factor in the comparison of the FYF and the group of the other Fuchsia combinations (chi-square test  $p < 0.05$ ): (-) negative (adj. residual  $< -2$ ); (+) positive /adj. residual  $> 2$ );

Association between BC cases and each risk factor in the comparison of the FYF and the group of the other Fuchsia combinations (chi-square test  $p < 0.05$ ): (c) positive (adj. residual  $> 2$ )

**Table S3** - Distribution of the characteristics included in the profile 3: Fuchsia family and focus on each combination of communities within the Fuchsia family

| Combination                                         | Combinations of communities within the Fuchsia family |                   |                   |                   |                 | chi-square test | Fuchsia combinations other than FYF | chi-square test | Overall Fuchsia family |
|-----------------------------------------------------|-------------------------------------------------------|-------------------|-------------------|-------------------|-----------------|-----------------|-------------------------------------|-----------------|------------------------|
|                                                     | FYF                                                   | FYY               | FYG               | FYB               | FYA             |                 |                                     |                 |                        |
| <b>Number of women</b>                              | 193                                                   | 360               | 136               | 342               | 268             |                 | 1,106                               |                 | 1,299                  |
| <b>BC prevalence [95% CI]</b>                       | 4.7% [2.1-8.7%]                                       | 1.9% [0.8 - 4.0%] | 2.2% [0.5 - 6.3%] | 2.3% [1.0 - 4.6%] | 1.9% [0.6-4.3%] | p>0.05          | 2.1% [1.4 - 3.1%]                   | p=0.033         | 2.5% [95%CI: 1.7-3.5%] |
| <b>Current and past smoking habit</b>               |                                                       |                   |                   |                   |                 | p<0.001         |                                     | p<0.001         |                        |
| never-smokers                                       | 68.4%**(+)                                            | 38.6%             | 30.1%*            | 37.1%*            | 43.3%           |                 | 38.2%(-)                            |                 | 42.7%                  |
| 1-5 cigarettes/day                                  | 15.0%*(-)                                             | 40.0%**           | 17.6%*            | 31.3%             | 23.5%           |                 | 30.6%(+)                            |                 | 28.3%                  |
| 6-10 cigarettes/day                                 | 8.8%*(-)                                              | 9.4%*             | 41.9%**           | 9.6%*             | 18.7%**         |                 | 15.7%(+)                            |                 | 14.7%                  |
| more than 10 cigarettes/day                         | 7.8%*(-)                                              | 11.9%             | 10.3%             | 21.9%**           | 14.6%           |                 | 15.5%(+)                            |                 | 14.3%                  |
| <b>Alcohol drinking habit:</b>                      |                                                       |                   |                   |                   |                 | p<0.001         |                                     | p<0.001         |                        |
| no alcohol drinker                                  | 46.1%**(+)                                            | 19.7%*            | 17.6%             | 16.1%*            | 27.6%           |                 | 30.3%(-)                            |                 | 24.1%                  |
| one time per week or less                           | 34.7%*(-)                                             | 43.9%             | 56.6%**           | 56.4%**           | 46.3%           |                 | 49.9%(+)                            |                 | 47.7%                  |
| more times per week                                 | 19.2%*(-)                                             | 36.4%**           | 25.7%             | 27.5%             | 24.3%           |                 | 29.4%(+)                            |                 | 27.9%                  |
| binge-drinking at least one time per week           | 0.0%                                                  | 0.0%              | 0.0%              | 0.0%              | 1.9%**          |                 | 0.5%                                |                 | 0.4%                   |
| <b>WCRF recommendations compliance:</b>             |                                                       |                   |                   |                   |                 |                 |                                     |                 |                        |
| 1. Stay physically active every day                 |                                                       |                   |                   |                   |                 | p<0.001         |                                     | p>0.05          |                        |
| low                                                 | 36.3%(b)(c)                                           | 30.8%*            | 27.9%*            | 22.5%*            | 62.3%**         |                 | 35.5%                               |                 | 35.6%                  |
| medium                                              | 42.0%                                                 | 51.4%**           | 41.9%             | 34.2%*            | 32.1%*          |                 | 40.2%                               |                 | 40.5%                  |
| high/very high                                      | 21.8%                                                 | 17.8%*            | 30.1%             | 43.3%**           | 5.6%*           |                 | 24.2%                               |                 | 23.9%                  |
| 2. Limit energy-dense foods and avoid sugary drinks |                                                       |                   |                   |                   |                 | p<0.001         |                                     | p>0.05          |                        |
| low                                                 | 18.1%                                                 | 15.3%*            | 16.9%             | 9.1%*             | 60.4%**         |                 | 24.5%                               |                 | 23.6%                  |
| medium                                              | 29.5%                                                 | 46.9%**           | 27.9%             | 16.1%*            | 21.6%*          |                 | 28.9%                               |                 | 29.0%                  |
| high/very high                                      | 52.3%                                                 | 37.8%*            | 55.1%             | 74.9%**           | 17.9%*          |                 | 46.6%                               |                 | 47.4%                  |

|                                                                          |            |         |         |          |         |          |         |
|--------------------------------------------------------------------------|------------|---------|---------|----------|---------|----------|---------|
| 3. Follow a diet mainly based on plant foods, cereals, fruit and legumes |            |         |         |          |         | p<0.001  | p<0.001 |
| low                                                                      | 4.7%*(-)   | 7.2%*   | 11.8%   | 2.6%*    | 41.8%** | 14.7%(+) | 13.2%   |
| medium                                                                   | 49.7%**    | 60.0%** | 39.7%   | 25.4%*   | 35.4%*  | 40.9%    | 42.2%   |
| high/very high                                                           | 45.6%(+)   | 32.8%*  | 48.5%   | 71.9%**  | 22.8%   | 44.4%(-) | 44.6%   |
| 4. Limit the consumption of red meats and cured meats                    |            |         |         |          |         | p<0.001  | p<0.001 |
| low                                                                      | 5.2%*(-)   | 8.6%*   | 13.2%   | 5.6%*(b) | 42.9%** | 16.5%(+) | 14.9%   |
| medium                                                                   | 42.0%      | 60.3%** | 32.4%   | 21.9%*   | 37.7%   | 39.5%    | 39.9%   |
| high/very high                                                           | 52.8%**(+) | 31.1%*  | 54.4%** | 72.5%**  | 19.4%*  | 43.9%(-) | 45.3%   |
| 5. Limit the consumption of salt                                         |            |         |         |          |         | p<0.001  | p=0.001 |
| low                                                                      | 6.7%*(-)   | 6.9%*   | 9.6%    | 5.8%*    | 44.8%** | 16.1%(+) | 14.7%   |
| medium                                                                   | 35.8%      | 52.5%** | 39.7%   | 20.8%*   | 33.2%   | 36.4%    | 36.3%   |
| high/very high                                                           | 57.5%**(+) | 40.6%*  | 50.7%   | 73.4%**  | 22.0%*  | 47.5%(-) | 49.0%   |
| 6. Follow a varied diet                                                  |            |         |         |          |         | p<0.001  | p=0.027 |
| low                                                                      | 2.1%*(-)   | 0.6%*   | 5.9%    | 1.5%*    | 24.3%** | 7.2%(+)  | 6.5%    |
| medium                                                                   | 45.6%      | 57.2%** | 41.2%   | 21.9%*   | 52.2%** | 43.1%    | 43.5%   |
| high/very high                                                           | 52.3%      | 42.2%*  | 52.9%   | 76.6%**  | 23.5%*  | 49.6%    | 50.0%   |

Association between each risk factor and each Fuchsia combination (chi-square test  $p < 0.05$ ): \*negative (adj. residual  $< -2$ ); \*\*positive (adj. residual  $> 2$ );

Association between BC cases and each risk factor by Fuchsia combinations (chi-square test  $p < 0.05$ ): (a) negative (adj. res.  $< -2$ ); (b) positive (adj. res.  $> 2$ )

Association between each risk factor in the comparison of the FYF and the group of the other Fuchsia combinations (chi-square test  $p < 0.05$ ): (-) negative (adj. residual  $< -2$ ); (+) positive /adj. residual  $> 2$ );

Association between BC cases and each risk factor in the comparison of the FYF and the group of the other Fuchsia combinations (chi-square test  $p < 0.05$ ): (c) positive (adj. residual  $> 2$ )
